# Supplementary material
Source: publisher figshare collection journal article supplement (https://acs.figshare.com/ndownloader/files/5670216)
Supplement: Supplementary file 1 [file 5670216]

## SUPPORTING INFORMATION

### Structural features of dilute acid pretreated *Acacia mangium* and impact of sodium sulfite supplementation on enzymatic hydrolysis

Surbhi Semwal<sup>†</sup>, Ruchi Gaur<sup>†</sup>, Suman Mukherjee<sup>‡</sup>, Anju Chopra<sup>‡</sup>, Ravi P Gupta<sup>†</sup>, Ravindra Kumar<sup>†,\*</sup> and Deepak K. Tuli<sup>†</sup>

<sup>†</sup> DBT-IOC Centre for Advanced Bioenergy Research, Research & Development Centre, Indian Oil Corporation Limited, Sector-13, Faridabad-121007, India

<sup>‡</sup> Analytical Division, Research & Development Centre, Indian Oil Corporation Limited, Sector-13, Faridabad-121007, India

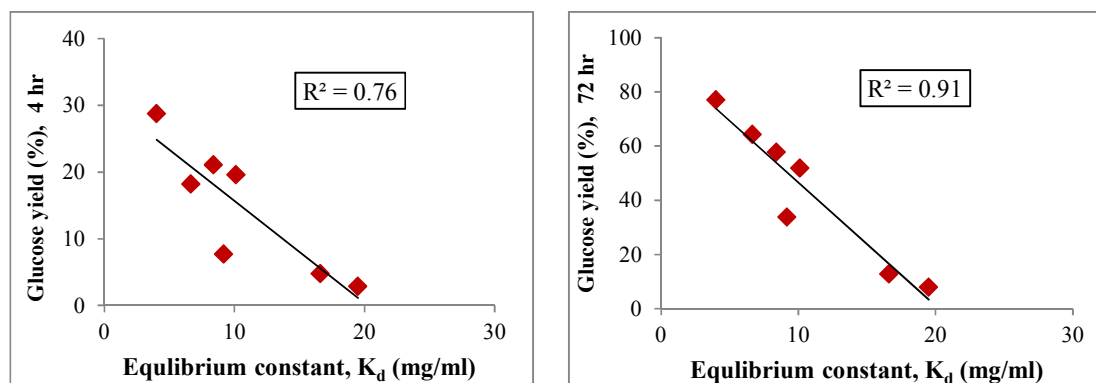

**Figure S1. Correlation of equilibrium constant, mg/ml ( $K_d$ ) and glucose yield (%) with 20 FPU advance enzyme at 4 h and 72 h of native and pretreated *A.mangium***
